# Supplementary material for: Engaging Community Leaders in the Development of a Cardiovascular Health Behavior Survey Using Focus Group–Based Cognitive Interviewing
Source: PubMed Central journal article supplement — Health Serv Insights. 2017 Apr 21;10:1178632917701123. doi: 10.1177/1178632917701123 (PMC5404898; doi:10.1177/1178632917701123), 2017-04-21
Supplement: Pages_from_Supplement_Table_For_HIS_701123.pdf [file Pages_from_Supplement_Table_For_HIS_701123.pdf]

| <b>Supplemental Table 1: Focus Group Themes and Subthemes, CV Health and Needs</b> |                                                            |
|------------------------------------------------------------------------------------|------------------------------------------------------------|
| <b>Assessment Qualitative Study</b>                                                |                                                            |
| <b>1</b>                                                                           | <b>Question Improvement</b>                                |
|                                                                                    | Questions on Physical Activity                             |
|                                                                                    | Questions on Eating                                        |
|                                                                                    | Questions on Drinking                                      |
|                                                                                    | Formatting of scales/responses                             |
|                                                                                    | Consistency/timing of questions                            |
|                                                                                    | Clarification of definitions                               |
| <b>2</b>                                                                           | <b>Suggestions for Additional Questions</b>                |
|                                                                                    | Health behavior-related Questions                          |
|                                                                                    | Complementary Alternative Medicine (CAM)-related Questions |
|                                                                                    | Questions on Self-efficacy                                 |
| <b>3</b>                                                                           | <b>Community-Specific Issues</b>                           |
| <b>4</b>                                                                           | <b>Skip Logic of Questions</b>                             |
